# Supplementary material for: The Intriguing Biogeographic Pattern of the Italian Wall Lizard Podarcis siculus (Squamata: Lacertidae) in the Tuscan Archipelago Reveals the Existence of a New Ancient Insular Clade
Source: MDPI journal article supplement (doi:10.3390/ani13030386), 2023-01-23
Supplement: s1 [file s1]

**Table S2.** Absolute phenotypes frequencies in males.

| <b>Location</b> | <b>Campestris</b> | <b>Calabresiae</b> | <b>Intermediate1</b> | <b>Reticulated</b> | <b>Intermediate2</b> | <b>Concolor</b> |
|-----------------|-------------------|--------------------|----------------------|--------------------|----------------------|-----------------|
| Continent       | 155               | 2                  | 0                    | 0                  | 0                    | 0               |
| Elba            | 14                | 0                  | 0                    | 0                  | 0                    | 0               |
| Capraia         | 7                 | 0                  | 9                    | 16                 | 0                    | 2               |
| Cerboli         | 13                | 0                  | 0                    | 0                  | 0                    | 0               |
| Montecristo     | 0                 | 41                 | 1                    | 1                  | 0                    | 0               |
| Giglio          | 0                 | 0                  | 5                    | 38                 | 20                   | 31              |
| Giannutri       | 6                 | 5                  | 9                    | 23                 | 0                    | 15              |

**Table S3.** Absolute phenotypes frequencies in females.

| <b>Location</b> | <b>Campestris</b> | <b>Calabresiae</b> | <b>Intermediate1</b> | <b>Reticulated</b> | <b>Intermediate2</b> | <b>Concolor</b> |
|-----------------|-------------------|--------------------|----------------------|--------------------|----------------------|-----------------|
| Continent       | 102               | 0                  | 0                    | 0                  | 0                    | 0               |
| Elba            | 10                | 0                  | 0                    | 0                  | 0                    | 0               |
| Capraia         | 11                | 0                  | 1                    | 0                  | 0                    | 0               |
| Cerboli         | 6                 | 0                  | 0                    | 0                  | 0                    | 0               |
| Montecristo     | 0                 | 18                 | 0                    | 0                  | 0                    | 0               |
| Giglio          | 3                 | 1                  | 12                   | 14                 | 14                   | 19              |
| Giannutri       | 5                 | 4                  | 0                    | 6                  | 5                    | 6               |

**Table S4.** Primers for microsatellites loci used in genetic analyses.

| Locus   | Multiplex | Primer sequence                                                  | Ta (°C) | Allele range | N° alleles | References                     |
|---------|-----------|------------------------------------------------------------------|---------|--------------|------------|--------------------------------|
| Pb73    | Mix1      | <b>FAM</b> -GCCCATGTCACTTCAGGTAGAAGC<br>GAAAACTAGGAGTTAGGGAGAAGG | 57      | 126-134      | 5(2)       | Pinho et al., 2004             |
| C9      | Mix1      | <b>VIC</b> -CATTGCTGGTTCTGGAGAAAG<br>CCTGATGAAGGGAAGTGGTG        | 58      | 126-159      | 10(3)      | Nembini and<br>Opplinger, 2003 |
| Pli24   | Mix2      | <b>FAM</b> -CCACAAGGACTCAGGCTCTC<br>TCCCCCACTTAAGCATGTTC         | 56      | 101-113      | 4          | Bloor et al., 2011             |
| Pli4    | Mix2      | <b>FAM</b> -TCAGTTCATGCATAAGGTCCA<br>TTCGGCATTTCCTTCAGGT         | 56      | 319-439      | 24(9)      | Bloor et al., 2011             |
| Pli18   | Mix2      | <b>NED</b> -CAAGAATTGAGTTTGCAGTTCC<br>TGCTGACAGAATGTGCTTCTC      | 56      | 116-168      | 14(2)      | Bloor et al., 2011             |
| Pb10    | Mix2      | <b>VIC</b> -AGTGGAATCGGCTGCAATAC<br>ACCAGTCCCAGGAATTTAGG         | 58      | 202-226      | 6          | Pinho et al., 2004             |
| Lv-4-a  | Mix3      | <b>PET</b> -CTGCAGGGAACAGAATTAACC<br>CTGCCCAGAAAGCATTTC          | 60      | 95-121       | 10(2)      | Boudjemadi et al.,<br>1999     |
| Lv-4-19 | Mix3      | <b>NED</b> -CTGTTGCTATTTTGTATGCTTAC<br>CTGCCCAGAAAGCATTTC        | 57      | 114-140      | 10(5)      | Boudjemadi et al.,<br>1999     |
